# Supplementary material for: Horizontal gene transfer in chromalveolates
Source: PubMed Central journal article supplement (PMC2064935; doi:10.1186/1471-2148-7-173), 2007-09-25
Supplement: 1471-2148-7-173-S1.pdf [file 1471-2148-7-173-S1.pdf]

**Additional File**

Title: Supporting materials for the study.

**Sequences used in this study.**

| <b>Protein</b>   | <b>Taxon</b>                     | <b>Sequence Accession Number</b>                                                                          |
|------------------|----------------------------------|-----------------------------------------------------------------------------------------------------------|
| <b>WECE</b>      | <i>Seculamonas ecuadoriensis</i> | <a href="#">EC816654</a> ; <a href="#">EC816654</a>                                                       |
|                  | <i>Jakoba bahamiensis</i>        | <a href="#">EC686674</a> , <a href="#">EC685007</a> , <a href="#">EC684822</a>                            |
|                  | <i>Sawyeria marylandensis</i>    | <a href="#">EC826207</a>                                                                                  |
| <b>MVIM</b>      | <i>Karlodinium micrum</i>        | <a href="#">EC160173</a>                                                                                  |
|                  | <i>Jakoba bahamiensis</i>        | <a href="#">EC687464</a> , <a href="#">EC685628</a>                                                       |
|                  | <i>Sawyeria marylandensis</i>    | <a href="#">EC825128</a>                                                                                  |
| <b>Epimerase</b> | <i>Phytophthora ramorum</i>      | <a href="#">jgi Phyra1_1 73107 fgenesh1_pg.C_scaffold_2000172*</a>                                        |
|                  | <i>Thalassiosira pseudonana</i>  | <a href="#">jgi Thaps3 35046 e_gw1.6.331.1*</a>                                                           |
|                  | <i>Giardia lamblia</i>           | <a href="#">XP_769114</a> , <a href="#">AAO39053</a>                                                      |
|                  | <i>Spironucleus barkhanus</i>    | <a href="#">ABI15605</a>                                                                                  |
| <b>CAS -like</b> | <i>Karlodinium micrum</i>        | <a href="#">EC156868</a> , <a href="#">EC158513</a> , <a href="#">EC148099</a> , <a href="#">EC160669</a> |
|                  | <i>Alexandrium tamarense</i>     | <a href="#">CK784871</a>                                                                                  |
|                  | <i>Emiliana huxleyi</i>          | <a href="#">CF753752</a>                                                                                  |
|                  | <i>Isochrysis galbana</i>        | <a href="#">EC140831</a>                                                                                  |
|                  | <i>Chlamydomonas reinhardtii</i> | <a href="#">jgi Chlre3 127464 estExt_gwp_1H.C_20095*</a>                                                  |
|                  | <i>Ostreococcus lucimarinus</i>  | <a href="#">jgi Osta4 35883 1200010181*</a>                                                               |
|                  | <i>Ostreococcus tauri</i>        | <a href="#">jgi Ost9901_3 26795 eugene.1200010140*</a>                                                    |
| <b>MQO-DH</b>    | <i>Karlodinium micrum</i>        | <a href="#">EC161113</a> , <a href="#">EC156079</a> , <a href="#">EC151820</a>                            |
|                  | <i>Alexandrium tamarense</i>     | <a href="#">CF948531</a> , <a href="#">CV554334</a>                                                       |
|                  | <i>Heterocapsa triquetra</i>     | <a href="#">DT382779</a>                                                                                  |
|                  | <i>Emiliana huxleyi</i>          | <a href="#">CX779033</a>                                                                                  |
| <b>MQO-A</b>     | <i>Plasmodium yoelii</i>         | <a href="#">EAA17232</a>                                                                                  |
|                  | <i>Plasmodium berghei</i>        | <a href="#">CAH94470</a>                                                                                  |
|                  | <i>Plasmodium chabaudi</i>       | <a href="#">XP_742339</a>                                                                                 |
|                  | <i>Plasmodium falciparum</i>     | <a href="#">CAG25406</a>                                                                                  |
|                  | <i>Toxoplasma gondii</i>         | <a href="#">ABE76504</a>                                                                                  |
|                  | <i>Eimeria tenella</i>           | <a href="#">CAK51433</a>                                                                                  |
| <b>mtMDH</b>     | <i>Karlodinium micrum</i>        | <a href="#">EC154776</a>                                                                                  |
|                  | <i>Alexandrium tamarense</i>     | <a href="#">CK784465</a>                                                                                  |
|                  | <i>Isochrysis galbana</i>        | <a href="#">EC147060</a> , <a href="#">EC147055</a>                                                       |
| <b>cytMDH</b>    | <i>Isochrysis galbana</i>        | <a href="#">EC143180</a> , <a href="#">EC146073</a>                                                       |
|                  | <i>Pavlova lutheri</i>           | <a href="#">EC176556</a> , <a href="#">EC176389</a> , <a href="#">EC176299</a>                            |
| <b>NADP-IDH</b>  | <i>Karlodinium micrum</i>        | <a href="#">EC155818</a> , <a href="#">EC150415</a>                                                       |
|                  | <i>Alexandrium tamarense</i>     | <a href="#">CK433031</a> , <a href="#">CK784788</a> , <a href="#">CK783806</a>                            |
|                  | <i>Amphidinium carterae</i>      | <a href="#">CF065460</a> , <a href="#">CF064816</a>                                                       |
|                  | <i>Heterocapsa triquetra</i>     | <a href="#">DT385947</a> , <a href="#">DT385631</a>                                                       |

|                |                                  |                                                                                                                                      |
|----------------|----------------------------------|--------------------------------------------------------------------------------------------------------------------------------------|
|                | <i>Lingulodinium polyedrum</i>   | <a href="#">BP743001</a> , <a href="#">CD809840</a>                                                                                  |
|                | <i>Phaeodactylum tricornutum</i> | <a href="#">jgi Phatr2 34602 fgenes1_pg.C_chr_5000402*</a> ,<br><a href="#">jgi Phatr2 45017 estExt_fgenes1_pg.C_chr_50402*</a>      |
|                | <i>Thalassiosira pseudonana</i>  | <a href="#">jgi Thaps3 1456 fgenes1_pg.C_chr_1000590*</a>                                                                            |
|                | <i>Isochrysis galbana</i>        | <a href="#">EC138409</a>                                                                                                             |
| <b>FE-ADH</b>  | <i>Naegleria gruberi</i>         | <a href="#">jgi Naegr1 56035 estExt_fgenesHS_kg.C_70004*</a>                                                                         |
| <b>PutA</b>    | <i>Karlodinium micrum</i>        | <a href="#">EC155616</a>                                                                                                             |
|                | <i>Phaeodactylum tricornutum</i> | <a href="#">jgi Phatr2 21068 estExt_gwp_gw1.C_chr_110150*</a>                                                                        |
|                | <i>Phytophthora ramorum</i>      | <a href="#">jgi Phyra1_1 71205 fgenes1_pm.C_scaffold_8000011*</a>                                                                    |
|                | <i>Jakoba libera</i>             | <a href="#">EC693135</a>                                                                                                             |
|                | <i>Seculamonas ecuadoriensis</i> | <a href="#">EC816325</a>                                                                                                             |
|                | <i>Physarum polycephalum</i>     | <a href="#">EC757810</a>                                                                                                             |
|                | <i>Cyanidioschyzon merolae</i>   | <a href="#">gn CMER CMR066C**</a>                                                                                                    |
|                | <i>Chlamydomonas reinhardtii</i> | <a href="#">jgi Chlre3 24394 estExt_fgenes1_pm.C_440003*</a>                                                                         |
|                | <i>Ostreococcus tauri</i>        | <a href="#">jgi Ostva4 28991 estExt_gwp_GeneWisePlus.C_Chrom_10.00_010194*</a>                                                       |
| <b>PBPb</b>    | <i>Karlodinium micrum</i>        | <a href="#">EC150730</a>                                                                                                             |
|                | <i>Alexandrium tamarense</i>     | <a href="#">CF948337</a>                                                                                                             |
|                | <i>Emiliana huxleyi</i>          | <a href="#">EG034291</a>                                                                                                             |
|                | <i>Isochrysis galbana</i>        | <a href="#">EC139997</a>                                                                                                             |
|                | <i>Phaeodactylum tricornutum</i> | <a href="#">jgi Phatr2 34826 fgenes1_pg.C_chr_6000199*</a>                                                                           |
|                | <i>Euglena gracilis</i>          | <a href="#">EC676369</a>                                                                                                             |
| <b>SIR2</b>    | <i>Sawyeria marylandensis</i>    | <a href="#">EC825857</a>                                                                                                             |
|                | <i>Acanthamoeba castellanii</i>  | <a href="#">EC105362</a>                                                                                                             |
|                | <i>Phaeodactylum tricornutum</i> | <a href="#">jgi Phatr2 36942 fgenes1_pg.C_chr_11000295*</a>                                                                          |
|                | <i>Thalassiosira pseudonana</i>  | <a href="#">jgi Thaps3 269475 estExt_thaps1_ua_kg.C_chr_100004*</a>                                                                  |
|                | <i>Chlamydomonas reinhardtii</i> | <a href="#">jgi Chlre3 113408 e_gwW.4.63.1</a>                                                                                       |
| <b>AsIA</b>    | <i>Alexandrium tamarense</i>     | <a href="#">CK785860</a>                                                                                                             |
| <b>ATS1</b>    | <i>Karlodinium micrum</i>        | <a href="#">EC159487</a> , <a href="#">EC155725</a> , <a href="#">EC159597</a> , <a href="#">EC159682</a> , <a href="#">EC158675</a> |
|                | <i>Amphidinium carterae</i>      | <a href="#">CF065437</a>                                                                                                             |
|                | <i>Lingulodinium polyedrum</i>   | <a href="#">BP742850</a>                                                                                                             |
| <b>COG3618</b> | <i>Alexandrium tamarense</i>     | <a href="#">EC154481</a>                                                                                                             |
|                | <i>Karlodinium micrum</i>        | <a href="#">CK431462</a>                                                                                                             |
| <b>COG3022</b> | <i>Alexandrium tamarense</i>     | <a href="#">CK785470</a>                                                                                                             |
|                | <i>Lingulodinium polyedrum</i>   | <a href="#">BP743223</a>                                                                                                             |
| <b>EF2</b>     | <i>Karlodinium micrum</i>        | <a href="#">EC160362</a> , <a href="#">EC159484</a> , <a href="#">EC152658</a>                                                       |
|                | <i>Alexandrium tamarense</i>     | <a href="#">CK782463</a>                                                                                                             |
|                | <i>Amphidinium carterae</i>      | <a href="#">CF065997</a> , <a href="#">CF067005</a>                                                                                  |
|                | <i>Heterocapsa triquetra</i>     | <a href="#">DT385971</a> , <a href="#">DT385641</a>                                                                                  |
|                | <i>Lingulodinium polyedrum</i>   | <a href="#">BP743144</a>                                                                                                             |
|                | <i>Pyrocystis lunula</i>         | <a href="#">BU582439</a>                                                                                                             |
|                | <i>Paramecium tetraurelia</i>    | <a href="#">scaffold_151</a>                                                                                                         |
|                | <i>Isochrysis galbana</i>        | <a href="#">EC145862</a> , <a href="#">EC143408</a> , <a href="#">EC143130</a>                                                       |

|                                    |                                                                                                           |
|------------------------------------|-----------------------------------------------------------------------------------------------------------|
| <i>Pavlova lutheri</i>             | <a href="#">EC177146</a> , <a href="#">EC177552</a> , <a href="#">EC176343</a>                            |
| <i>Phytophthora ramorum</i>        | <a href="#">jgi Phyra1_1 71206 fgenes1_pm.C_scaffold_8000012*</a>                                         |
| <i>Phytophthora sojae</i>          | <a href="#">jgi Physo1_1 109259 estExt_fgenes1_pm.C_810006*</a>                                           |
| <i>Thalassiosira pseudonana</i>    | <a href="#">jgi Thaps3 269148 estExt_thaps1_ua_kg.C_chr_60290*</a>                                        |
| <i>Jakoba libera</i>               | <a href="#">EC692709</a> , <a href="#">EC692770</a> , <a href="#">EC690987</a>                            |
| <i>Cyanophora paradoxa</i>         | <a href="#">EC660009</a> , <a href="#">EG946313</a> , <a href="#">EG944985</a> , <a href="#">EG946356</a> |
| <i>Glaucozystis nostochinearum</i> | <a href="#">EC124674</a>                                                                                  |

Note: All sequences except for the sequences labeled with “\*” and “\*\*” are available from the GenBank nonredundant data base and dbEST (<http://www.ncbi.nlm.nih.gov/>). Sequences labeled with “\*” are available from the DOE Joint Genome Institute (JGI) (<http://www.jgi.doe.gov/>); “\*\*” – from the *Cyanidioschyzon merolae* Genome Project database (<http://merolae.biol.s.u-tokyo.ac.jp/>)

**A Fe-ADH**

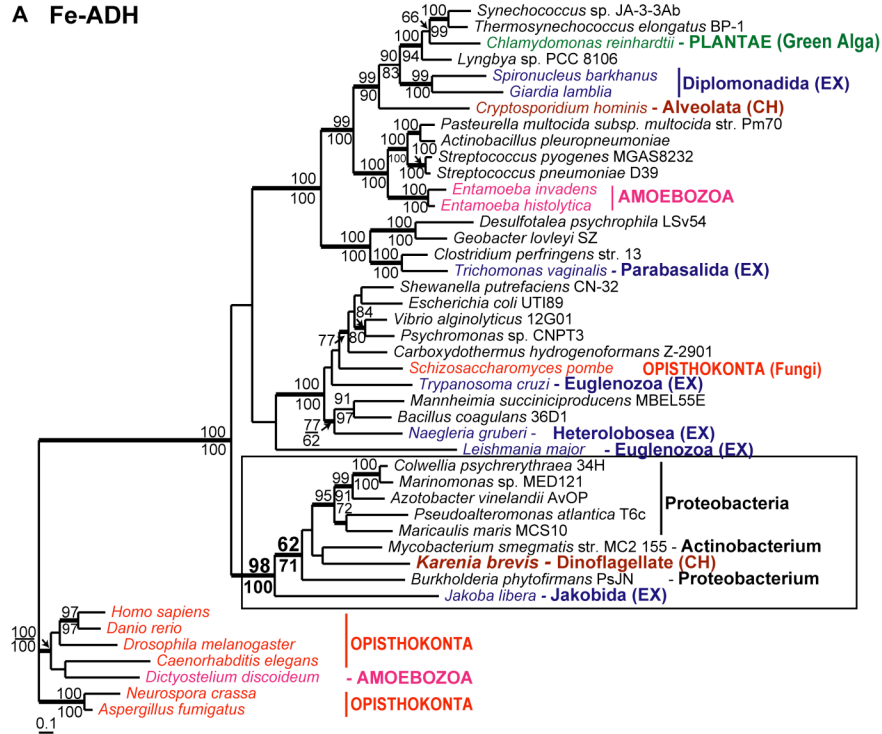

**B PutA**

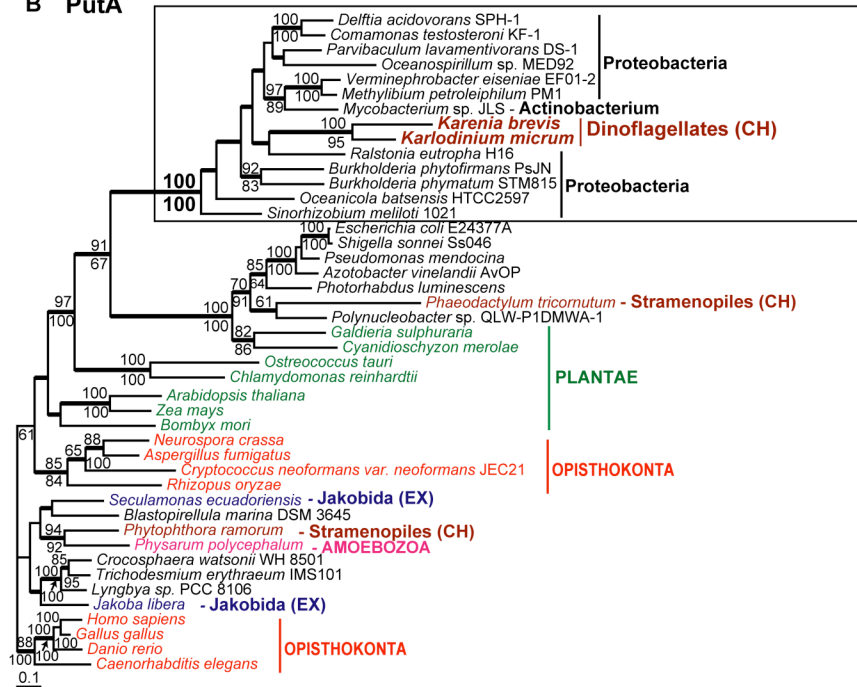

**Origins of iron-containing alcohol dehydrogenase (Fe-ADH) and NAD-dependent aldehyde dehydrogenase (PutA) in eukaryotes by multiple HGTs**

**A.** ML tree of Fe-ADH. **B.** ML tree of PutA. The numbers above and below the branches are the results of ML and NJ bootstrap analyses, respectively. Only bootstrap values  $\geq 60\%$  are shown. The thick branches indicate  $\geq 0.96$  posterior probability from Bayesian inference. Branch lengths are proportional to the number of substitutions per site (see scale bars). CH and brown color indicate a supergroup Chromalveolata; EX and blue color indicate a supergroup Excavata. Red color indicates Opisthokonta, pink – Amoebozoa, green – Plantae.

**A. PBPb**

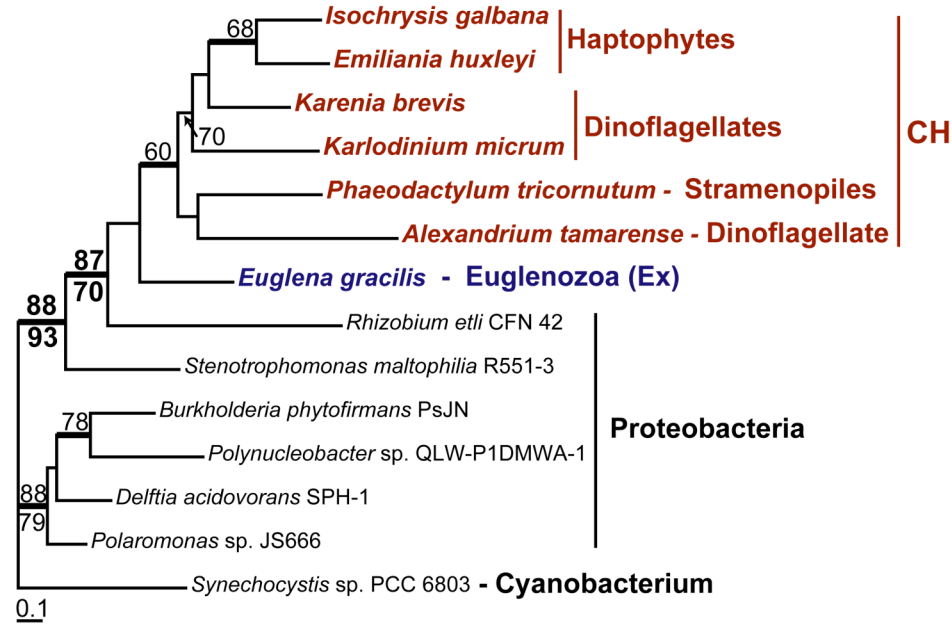

**B. SIR-2**

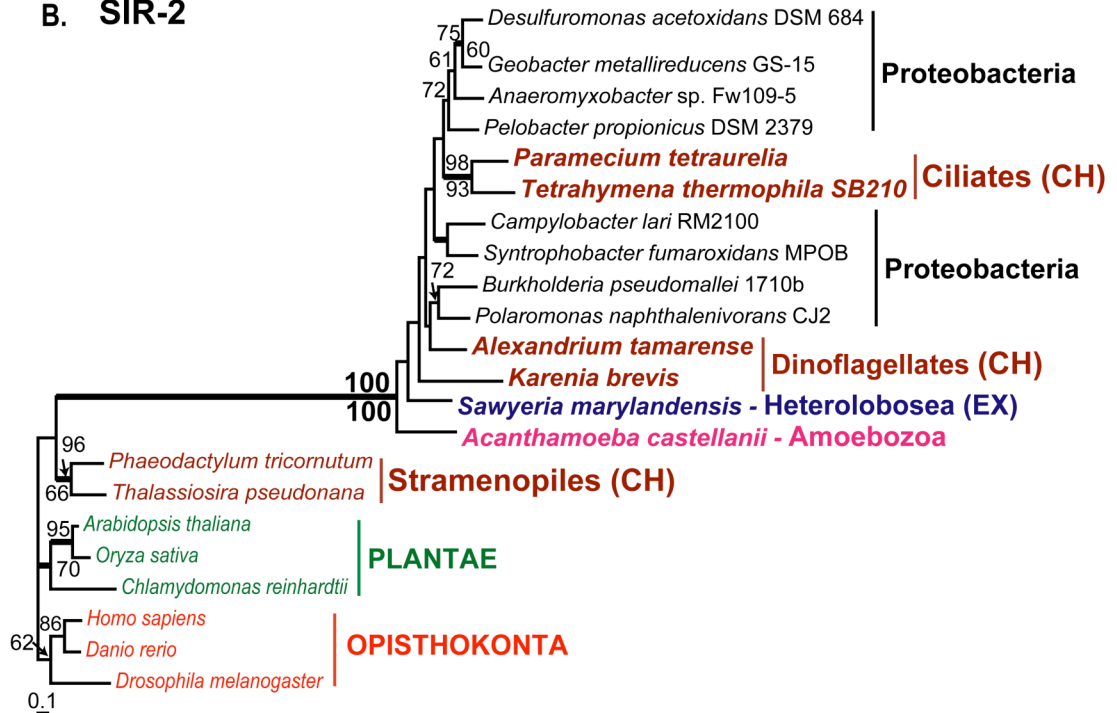

**Origins of substrate-bound periplasmic binding protein (PBPb) and silent information regulator 2 (SIR2) in protists**

A. ML tree of PBPb. B. ML tree of SIR2. The numbers above and below the branches are the results of ML and NJ bootstrap analyses, respectively. Only bootstrap values  $\geq 60\%$  are shown. The thick branches indicate  $\geq 0.96$  posterior probability from Bayesian inference. Branch lengths are proportional to the number of substitutions per site (see scale bars). Short abbreviations and the color scheme are as above.

**A. Arylsulfatase A (AsIA)**

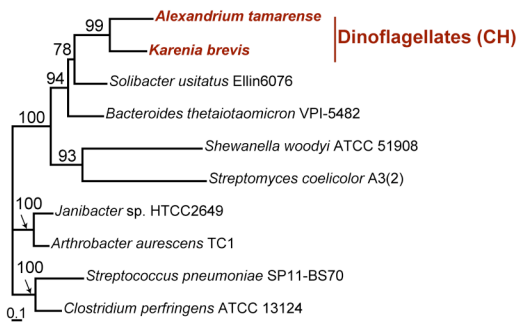

**B. COG3129 - like protein**

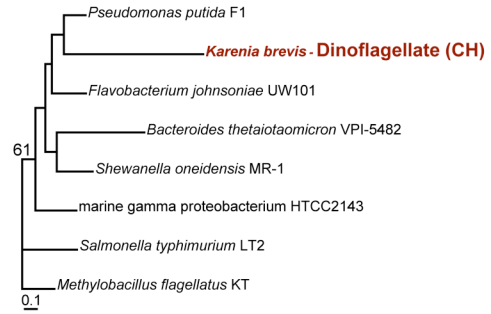

**C. Alpha-tubulin suppressor protein (ATS1)**

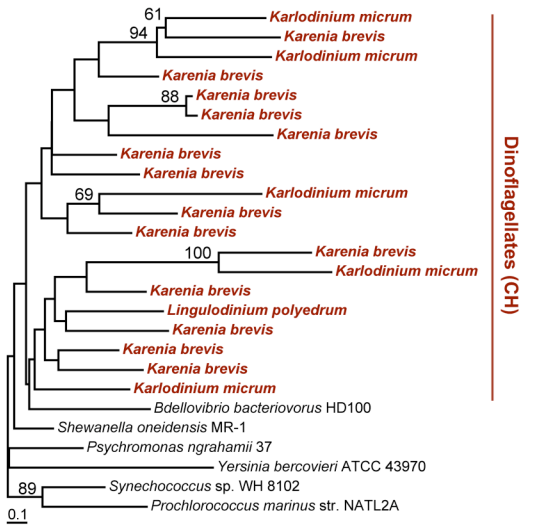

**D. Pyridoxal phosphate biosynthetic protein PdxA**

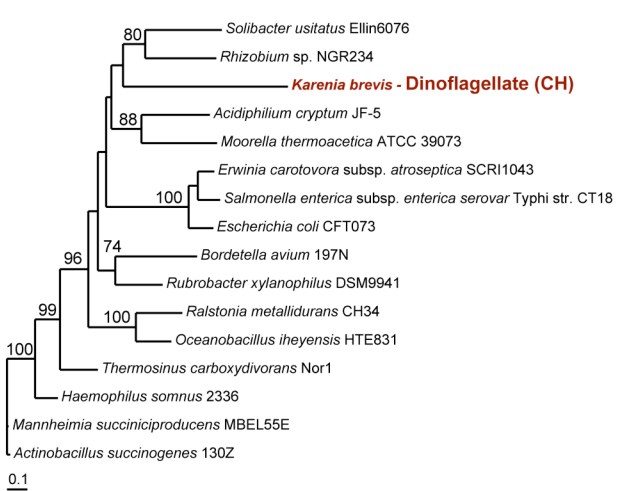

**E. COG3618 - like protein**

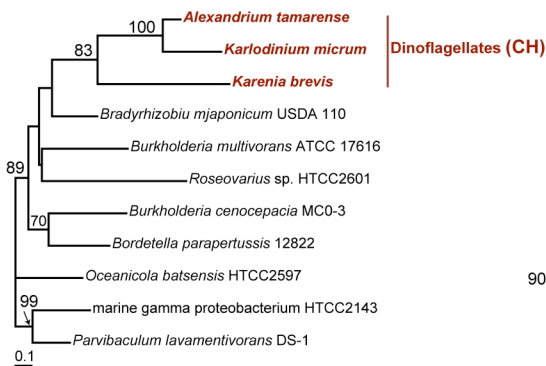

**F. COG3022 - like protein**

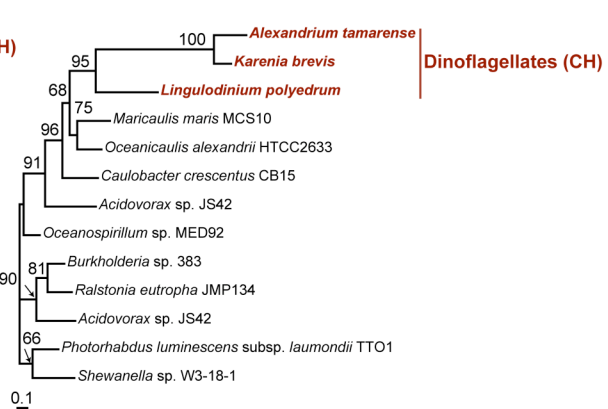

**Horizontal gene transfer from bacteria to dinoflagellates**

ML trees of: **A.** Arylsulfatase A (AsIA). **B.** COG3129-like protein. **C.** Alpha-tubulin suppressor protein (ATS1). **D.** Pyridoxal phosphate biosynthetic protein PdxA. **E.** COG3618-like protein. **F.** COG3022-like protein. The numbers above the branches are the results of ML bootstrap analyses. Only bootstrap values  $\geq 60\%$  are shown. Branch lengths are proportional to the number of substitutions per site (see scale bars). Short abbreviations and the color scheme are as above.
